# Supplementary material
Source: publisher figshare collection journal article supplement (https://frontiersin.figshare.com/ndownloader/files/28540530)
Supplement: Supplementary file 1 [file 28540530]

**Supplementary Table 1** | Summary statistics of bull shark individuals included in analyses.  $\Delta$  = number of diving days between first and last entry in the database and number of days that individual was actually encountered at the Shark Reef Marine Reserve. SFI = site fidelity index.

| ID# | Name       | Sex | Date first | Date last  | $\Delta$ (d) | #days enctr. | SFI  |
|-----|------------|-----|------------|------------|--------------|--------------|------|
| 1   | Big Mama   | F   | 26.01.2003 | 15.02.2016 | 1676         | 49           | 0.03 |
| 2   | Whitenose  | M   | 26.01.2003 | 11.06.2016 | 1739         | 554          | 0.32 |
| 3   | Jaws       | M   | 01.02.2003 | 22.08.2005 | 297          | 92           | 0.31 |
| 4   | Hook       | F   | 30.03.2003 | 11.06.2016 | 1728         | 437          | 0.25 |
| 5   | Long John  | M   | 11.05.2003 | 23.06.2016 | 1730         | 383          | 0.22 |
| 6   | Stumpy     | F   | 25.06.2003 | 09.05.2016 | 1688         | 69           | 0.04 |
| 7   | Crook      | F   | 02.07.2003 | 13.06.2016 | 1709         | 497          | 0.29 |
| 8   | Granma     | F   | 02.07.2003 | 09.06.2016 | 1706         | 300          | 0.18 |
| 9   | Bum        | F   | 20.07.2003 | 11.06.2016 | 1704         | 420          | 0.25 |
| 10  | Kinky      | F   | 03.08.2003 | 02.08.2010 | 926          | 184          | 0.2  |
| 11  | Annie      | F   | 07.09.2003 | 26.07.2011 | 1081         | 55           | 0.05 |
| 12  | Crush      | F   | 10.09.2003 | 19.05.2016 | 1674         | 129          | 0.08 |
| 13  | Monica     | F   | 03.01.2004 | 16.06.2016 | 1664         | 377          | 0.23 |
| 14  | Rip        | F   | 06.01.2004 | 04.05.2013 | 1238         | 95           | 0.08 |
| 15  | Curly      | F   | 26.01.2004 | 21.06.2016 | 1656         | 392          | 0.24 |
| 16  | Blackbeard | M   | 18.02.2004 | 20.04.2010 | 813          | 26           | 0.03 |
| 17  | Grin       | F   | 18.02.2004 | 30.04.2016 | 1616         | 231          | 0.14 |
| 18  | Flop       | F   | 03.03.2004 | 31.07.2015 | 1486         | 436          | 0.29 |
| 19  | Chopper    | M   | 03.07.2004 | 01.05.2012 | 1078         | 281          | 0.26 |
| 20  | Hotlips    | F   | 09.01.2007 | 16.06.2016 | 1327         | 240          | 0.18 |
| 21  | Second     | F   | 09.01.2007 | 21.06.2016 | 1331         | 218          | 0.16 |
| 22  | Chica      | F   | 13.01.2007 | 07.06.2016 | 1320         | 344          | 0.26 |
| 23  | Blunt      | F   | 27.04.2007 | 21.06.2016 | 1283         | 347          | 0.27 |
| 24  | Detour     | F   | 27.04.2007 | 23.06.2016 | 1285         | 281          | 0.22 |
| 25  | Bumphead   | F   | 17.12.2007 | 29.04.2016 | 1149         | 183          | 0.16 |
| 26  | Rusty      | F   | 21.12.2007 | 20.06.2016 | 1180         | 89           | 0.08 |
| 27  | Scar       | F   | 08.02.2008 | 12.03.2011 | 510          | 39           | 0.08 |
| 28  | Sierra     | F   | 15.01.2009 | 21.06.2016 | 1031         | 129          | 0.13 |
| 29  | Maite      | F   | 20.01.2009 | 14.04.2016 | 987          | 203          | 0.21 |
| 30  | Lee        | F   | 26.01.2009 | 27.06.2012 | 544          | 193          | 0.35 |
| 31  | Valerie    | F   | 23.02.2009 | 07.08.2015 | 864          | 83           | 0.1  |
| 32  | Marlen     | F   | 10.03.2009 | 25.04.2016 | 978          | 133          | 0.14 |
| 33  | Sickle     | F   | 10.03.2009 | 04.05.2013 | 587          | 151          | 0.21 |
| 34  | Trailer    | M   | 10.03.2009 | 12.05.2016 | 989          | 213          | 0.22 |
| 35  | Twist      | F   | 14.03.2009 | 10.06.2016 | 1006         | 105          | 0.1  |
| 36  | Topsail    | F   | 17.03.2009 | 21.06.2016 | 1012         | 345          | 0.34 |
| 37  | Moana      | F   | 24.03.2009 | 15.02.2014 | 748          | 74           | 0.1  |
| 38  | Tip        | F   | 24.03.2009 | 23.06.2016 | 1008         | 277          | 0.27 |
| 39  | Brenda     | F   | 30.03.2009 | 23.06.2016 | 1005         | 227          | 0.23 |
| 40  | Elvira     | F   | 13.04.2009 | 21.05.2016 | 978          | 118          | 0.12 |
| 41  | Trevally   | F   | 07.05.2009 | 09.06.2016 | 973          | 122          | 0.13 |
| 42  | Fold       | F   | 18.05.2009 | 06.06.2016 | 964          | 242          | 0.25 |
| 43  | Nani       | F   | 16.06.2009 | 31.12.2015 | 863          | 157          | 0.18 |
| 44  | Gill       | F   | 10.07.2009 | 22.01.2016 | 857          | 113          | 0.13 |
| 45  | Wave       | F   | 28.09.2009 | 21.06.2016 | 903          | 228          | 0.25 |

|    |              |   |            |            |      |     |      |
|----|--------------|---|------------|------------|------|-----|------|
| 46 | Junior       | F | 29.09.2009 | 16.05.2016 | 880  | 106 | 0.12 |
| 47 | Naughtylus   | F | 08.10.2009 | 17.06.2016 | 898  | 142 | 0.16 |
| 48 | Sharkman     | M | 30.01.2010 | 19.05.2016 | 849  | 169 | 0.2  |
| 49 | Pointer      | F | 10.03.2010 | 21.06.2016 | 1014 | 267 | 0.26 |
| 50 | Tipless      | F | 10.05.2010 | 22.12.2015 | 735  | 159 | 0.22 |
| 51 | Eroni        | M | 15.05.2010 | 25.06.2012 | 342  | 64  | 0.19 |
| 52 | Jorge        | M | 22.05.2010 | 12.04.2012 | 298  | 54  | 0.18 |
| 53 | Pecker       | F | 22.05.2010 | 24.05.2016 | 806  | 141 | 0.17 |
| 54 | Miss America | F | 27.05.2010 | 17.06.2016 | 817  | 251 | 0.31 |
| 55 | Mrs Jaws     | F | 27.05.2010 | 31.03.2016 | 773  | 62  | 0.08 |
| 56 | Shorty       | F | 08.06.2010 | 09.06.2016 | 805  | 142 | 0.18 |
| 57 | Nick         | F | 10.06.2010 | 03.06.2016 | 801  | 125 | 0.16 |
| 58 | Snip         | F | 12.06.2010 | 14.06.2016 | 807  | 93  | 0.12 |
| 59 | Chunky       | M | 20.09.2010 | 01.02.2016 | 677  | 121 | 0.18 |
| 60 | Corners      | F | 20.09.2010 | 17.06.2016 | 752  | 197 | 0.26 |
| 61 | Nica         | F | 20.09.2010 | 10.06.2016 | 744  | 131 | 0.18 |
| 62 | Funny Girl   | F | 21.09.2010 | 21.06.2016 | 753  | 202 | 0.27 |
| 63 | Batman       | M | 23.09.2010 | 18.04.2016 | 709  | 79  | 0.11 |
| 64 | Bulge        | F | 23.09.2010 | 22.03.2012 | 218  | 35  | 0.16 |
| 65 | Para         | F | 16.12.2010 | 17.08.2013 | 346  | 41  | 0.12 |
| 66 | Lefty        | F | 01.01.2011 | 16.06.2016 | 703  | 202 | 0.29 |
| 67 | Ripple       | M | 22.03.2012 | 20.06.2016 | 533  | 120 | 0.23 |
| 68 | Gillette     | F | 08.01.2015 | 21.06.2016 | 257  | 106 | 0.41 |
| 69 | Sharkbite    | M | 08.01.2015 | 14.06.2016 | 253  | 120 | 0.47 |
| 70 | Small Stumpy | F | 08.01.2015 | 21.06.2016 | 257  | 67  | 0.26 |
| 71 | Steps        | F | 08.01.2015 | 23.06.2016 | 258  | 154 | 0.6  |
| 72 | Tiny Stumpy  | F | 08.01.2015 | 14.06.2016 | 253  | 33  | 0.13 |
| 73 | Bump         | F | 09.01.2015 | 21.06.2016 | 256  | 93  | 0.36 |
| 74 | Colombiana   | F | 09.01.2015 | 20.06.2016 | 255  | 33  | 0.13 |
| 75 | Oceania      | F | 09.01.2015 | 16.06.2016 | 253  | 52  | 0.21 |
| 76 | Saddle       | F | 09.01.2015 | 20.06.2016 | 255  | 100 | 0.39 |
| 77 | Camel        | F | 17.01.2015 | 21.05.2016 | 235  | 81  | 0.34 |
| 78 | Slip         | F | 17.01.2015 | 21.06.2016 | 253  | 135 | 0.53 |
| 79 | Trigger      | F | 17.01.2015 | 17.06.2016 | 251  | 70  | 0.28 |
| 80 | Gape         | F | 20.01.2015 | 23.06.2016 | 253  | 27  | 0.11 |
| 81 | Damage       | F | 22.01.2015 | 16.06.2016 | 248  | 88  | 0.35 |
| 82 | Ecstasy      | F | 22.01.2015 | 22.10.2015 | 133  | 23  | 0.17 |
| 83 | Pincher      | F | 28.01.2015 | 16.05.2016 | 227  | 52  | 0.23 |
| 84 | Taryn        | F | 03.02.2015 | 23.06.2016 | 248  | 97  | 0.39 |
| 85 | Dagger       | F | 16.02.2015 | 20.06.2016 | 240  | 43  | 0.18 |
| 86 | Dope         | F | 21.02.2015 | 06.06.2016 | 228  | 33  | 0.14 |
| 87 | Jackie       | F | 21.02.2015 | 21.06.2016 | 238  | 59  | 0.25 |
| 88 | Rusi         | M | 30.07.2015 | 07.05.2016 | 131  | 21  | 0.16 |
| 89 | Lobe         | F | 20.10.2015 | 21.06.2016 | 252  | 211 | 0.84 |
| 90 | Scrappy      | F | 15.01.2016 | 06.06.2016 | 77   | 41  | 0.53 |
| 91 | Ana          | F | 19.01.2016 | 26.05.2016 | 70   | 39  | 0.56 |
